# Supplementary material
Source: PubMed Central journal article supplement (PMC1480458)

Null      Foxp3      Foxp3  $\Delta E$

FLAG-Foxp3

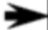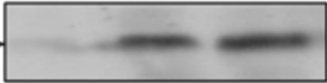

p38

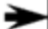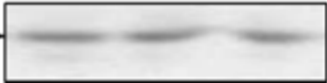

Supplement: pnas_0600225103_1.pdf [file pnas_0600225103_1.pdf]

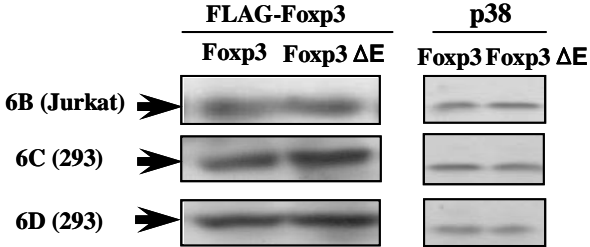

Supplement: pnas_0600225103_2.pdf [file pnas_0600225103_2.pdf]

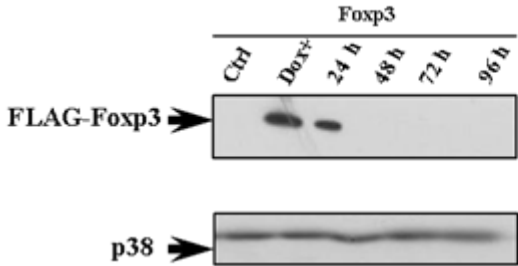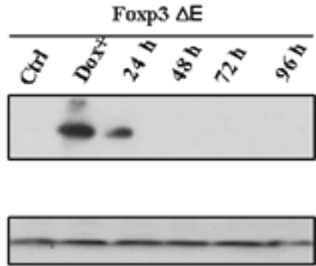

Supplement: pnas_0600225103_3.pdf [file pnas_0600225103_3.pdf]
